# Supplementary material
Source: PubMed Central journal article supplement (PMC6698250)
Supplement: mmc1.pdf [file mmc1.pdf]

YMTHE, Volume 27

## **Supplemental Information**

### **mRNA Delivery for Therapeutic Anti-HER2**

#### **Antibody Expression *In Vivo***

**Yulia Rybakova, Piotr S. Kowalski, Yuxuan Huang, John T. Gonzalez, Michael W. Heartlein, Frank DeRosa, Derfogail Delcassian, and Daniel G. Anderson**

1 **SUPPLEMENTAL MATERIALS**

2 *Supplemental Figure 1. Full trastuzumab construct used in the study.*

3 human immunoglobulin light chain kappa signal peptide

4 protein coding sequence without signal peptide

5 **Trastuzumab heavy chain mRNA**

6 GGACAGATCGCCTGGAGACGCCATCCACGCTGTTTTGACCTCCATAGAAGACACCG  
7 GGACCGATCCAGCCTCCGCGGCCGGGAACGGTGCATTGGAACGCGGATTCCCCGTG  
8 CCAAGAGTGACTACCGTCCTTGACACGATGAGGGCTTGGATCTTCTTTCTGCTCTG  
9 CCTGGCCGGGCGCGCCTTGGCCGAAGTTCAACTGGTAGAGAGTGGAGGTGGGCTTG  
10 TGCAACCAGGCGGATCCTTGC GACTGTCTTGC GCCGCTTCAGGCTTCAACATCAAGG  
11 ACACCTACATCCATTGGGTCCGCCAGGCACCAGGAAAAGGTCTTGAATGGGTGGCC  
12 AGAATCTACCCTACTAACGGTTACACCAGATATGCAGACTCCGTTAAGGGGCGATTT  
13 ACCATTT CAGCAGACACCTCTAAGAACACCGCTTACCTGCAGATGAACTCACTTCGA  
14 GCTGAGGACACCGCCGTTTACTATTGCAGCAGATGGGGCGGTGACGGCTTCTACGCT  
15 ATGGATTACTGGGGACAGGGGACTTTGGTAACTGTGAGTAGTGCATCTACAAAGGG  
16 GCCAAGCGTGTTCCCACTTGCCCCATCTTCTAAAAGCACCTCAGGAGGGACTGCAGC  
17 CTTGGGTTGCTTGGTTAAAGATTATTTTCCAGAGCCTGTAAGTGTATCCTGGAATAGT  
18 GGGGCCCTCACAAGCGGAGTACATACTTTCCCTGCAGTATTGCAGTCTAGTGGACTC  
19 TACTCTCTCAGCAGTGTAGTGACCGTACCTTCCAGTTCACTTGGAACACAGACCTAT  
20 ATTTGCAATGTGAATCATAAGCCATCTAATACTAAAGTGGATAAGAAAGTGGAGCC  
21 TAAATCTTGTGACAAGACTCATACATGCCCTCCCTGCCCTGCCCTGAACTGTTGGG  
22 AGGGCCCTCTGTATTTCTTCTTCCCCCTAAACCAAAGGACACCCTGATGATCAGTCG  
23 AACTCCTGAGGTGACTTGTGTGGTTGTTGACGTGTCACATGAGGATCCCGAAGTGAA  
24 ATTCAACTGGTACGTCGATGGAGTAGAGGTACACAATGCAAAGACAAAACCTAGGG  
25 AGGAACAGTATAATTCTACCTATAGAGTGGTGTCTGTTCTCACAGTTCTCCATCAAG  
26 ACTGGTTGAACGGTAAAGAATATAAATGCAAAGTCTCCAATAAGGCTTTGCCCGCTC  
27 CCATTGAAAAACAATCAGTAAAGCCAAAGGCCAGCCACGCGAACCACAGGTCTAC  
28 ACCCTTCCACCATCTCGCGAAGAAATGACTAAGAATCAAGTGTCACTCACATGCCTC  
29 GTCAAGGGCTTTTACCCTTCTGATATTGCAGTTGAATGGGAGTCTAACGGGCAGCCC  
30 GAGAATAATTACAAGACTACCCCCCGTCCTTGACTCTGATGGCAGCTTTTTCTGT  
31 ACTCAAAATTGACTGTGGACAAGTCTCGATGGCAACAGGGTAATGTTTTCTCCTGTA  
32 GCGTAATGCACGAGGCTCTTCATAACCATTATACCCAAAATCTCTTTCATTGTCCCC  
33 TGGAAAATGACGGGTGGCATCCCTGTGACCCCTCCCAGTGCCTCTCCTGGCCCTGG  
34 AAGTTGCCACTCCAGTGCCACCAGCCTTGTCTAATAAAAATTAAGTTGCATCAAGC  
35 T

36  
37 **Trastuzumab light chain mRNA**

38 GGACAGATCGCCTGGAGACGCCATCCACGCTGTTTTGACCTCCATAGAAGACACCG  
39 GGACCGATCCAGCCTCCGCGGCCGGGAACGGTGCATTGGAACGCGGATTCCCCGTG  
40 CCAAGAGTGACTACCGTCCTTGACACGATGAGGGCTTGGATCTTCTTTCTGCTCTG  
41 CCTGGCCGGGCGCGCCTTGGCCGATATTCAGATGACTCAGAGCCCCAGCAGCCTGT  
42 TGCTAGCGTTGGGGATAGAGTCACTATAACATGTCGGGCTTCCCAGGATGTGAATAC  
43 TGCTGTCGCTTGGTATCAACAGAAGCCCGCAAGGCACCAAACTGCTGATATATA  
44 GTGCCCTCTTCTTTACTCCGGGGTTCCCAGTCGATTCTCTGGAAGCCGCAGCGGCA  
45 CTGATTT CACTTACTATAAGTAGTCTGCAACCTGAGGACTTTGCTACATACTACTG  
46 CCAGCAGCACTATAACACCCCCAACTTTCGGGCAAGGCACTAAGGTAGAAATTA

47 AAAGGACCGTTGCTGCTCCATCCGTCTTTATTTTTCCACCATCTGATGAACAGTTGAA  
 48 GAGCGGAACAGCAAGCGTCGTTTGTCTCCTGAACAATTTTTACCCACGAGAGGCAA  
 49 AAGTTCAATGGAAGGTAGACAATGCTCTTCAGAGCGGCAATTCCCAGGAGAGCGTA  
 50 ACCGAGCAGGATAGCAAAGACTCTACATACTCTTTGAGTTCAACCCTTACCCTGAGC  
 51 AAGGCTGATTACGAAAAACACAAGGTGTACGCTTGGCAGGTAACCCATCAGGGATT  
 52 GTCATCCCCAGTCACAAAATCATTCAATAGGGGCGAGTGTGACGGGTGGCATCCCT  
 53 GTGACCCCTCCCCAGTGCCTCTCCTGGCCCTGGAAGTTGCCACTCCAGTGCCACCA  
 54 GCCTTGTCTAATAAAATTAAGTTGCATCAAGCT

55  
 56 **Supplemental Figure 2.** Alignment of trastuzumab peptides identified in serum of mice injected  
 57 with trastuzumab mRNA-LNPs with full trastuzumab amino acid sequence.

Trastuzumab Heavy Chain

```

QUERY 10 20 30 40 50 60 70 80 90 100 110
EVQLVESGGGLVQPGGSLRLSCAASGFNIKDTYIHWVRQAPGKGLEWVAR-----YADSVKGRFTISADTSKNTAYLQMNSLRAEDTAVYYCSRWGGDGFYAMDYWGQGLTIVTSS
T-HC 10 20 30 40 50 60 70 80 90 100 110 120
EVQLVESGGGLVQPGGSLRLSCAASGFNIKDTYIHWVRQAPGKGLEWVARIYPTNGYTRYADSVKGRFTISADTSKNTAYLQMNSLRAEDTAVYYCSRWGGDGFYAMDYWGQGLTIVTSS

QUERY 120 130 140 150 160 170 180 190 200 210 220 230 240
ASTKGPSVFPFLAPSSKSTSGGTAALGCLVK-----VDRKVEPKSCDKHTHTCPPCPAPPELLGG
T-HC 120 130 140 150 160 170 180 190 200 210 220 230 240
ASTKGPSVFPFLAPSSKSTSGGTAALGCLVKDYFPEPVTISWNSGALTSVGHVTFPAVLQSSSGLYSLSSVIVTVPSSSLGTQTYICNVNHHKPSNTKVDKVEPKSCDKHTHTCPPCPAPPELLGG

QUERY 170 180 190 200 210 220 230 240 250 260 270 280
PSVFLFPPPKKDTLMISRTPEVTCVVVDVSHEDPEVKFNWYVDGVEVHNAKTKPREEQYNSTYRVVSVLTVLHQDWLNGKEYK--VSNKALPAPIEK-----GQPREPQVYTLPPSREE
T-HC 170 180 190 200 210 220 230 240 250 260 270 280
PSVFLFPPPKKDTLMISRTPEVTCVVVDVSHEDPEVKFNWYVDGVEVHNAKTKPREEQYNSTYRVVSVLTVLHQDWLNGKEYKCKVSNKALPAPIEKTKSKAKGQPREPQVYTLPPSREE

QUERY 290 300 310 320 330 340 350 360
MTRKNQVSLTCLVKGFPYSDIAVEWESNGQPENNYKTPPVLDSDGSFFLYSKLTVDKSRWQQGNVFCSCVMHEALHNYTQK
T-HC 290 300 310 320 330 340 350 360
MTRKNQVSLTCLVKGFPYSDIAVEWESNGQPENNYKTPPVLDSDGSFFLYSKLTVDKSRWQQGNVFCSCVMHEALHNYTQKSLSLSPGK

Trastuzumab Light Chain

QUERY 10 20 30 40 50 60 70 80 90 100
DIQMTQSPSSLSASVGR-----ASQDVNTAVAWYQQKPKGAPKLLIYSASFLYSGVPSR-----SGTDFTLTISLQPEDFATYYCQQHYHTPPTFGQGTK----RTVAAPSVFIFPP
T-LC 10 20 30 40 50 60 70 80 90 100 110 120
DIQMTQSPSSLSASVGRVITCRASQDVNTAVAWYQQKPKGAPKLLIYSASFLYSGVPSRFSGSRSGTDFTLTISLQPEDFATYYCQQHYHTPPTFGQGTKVEIKRTVAAPSVFIFPP

QUERY 110 120 130 140 150 160 170 180
SDEQLKSGTASVVCLLNFPYR---VQWKVDNALQSGNSQESVTEQDSKDYSLSSLTLSKADYEKHKVYACEVTHQGLSSPVTK
T-LC 110 120 130 140 150 160 170 180 190 200 210
SDEQLKSGTASVVCLLNFPYRPREAKVQWKVDNALQSGNSQESVTEQDSKDYSLSSLTLSKADYEKHKVYACEVTHQGLSSPVTKSFNRGEC

```

58  
 59  
 60 **Supplemental Figure 3.** HER2 expression in MDA-MB-231-HER2 cells was measured using RT-  
 61 qPCR and compared to control MDA-MB-231 cells. Mean±SD, relative to HER2-expression in  
 62 MDA-MB-231 cells.

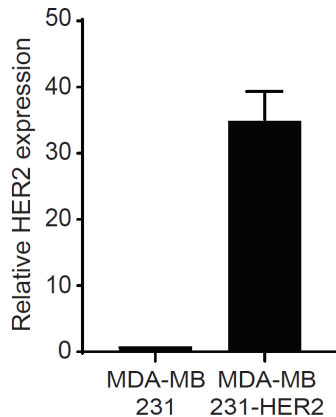

64 **Supplemental Figure 4.** RNA expression in tumor-bearing mice after LNP administration. IVIS  
 65 imaging of the whole-body (arrowheads point on tumor location) (A) and selected organs (B) from  
 66 athymic nude mice 6h after i.v. injection with Firefly luciferase (Fluc) mRNA formulated into LNPs.  
 67 Bioluminescence scale is radiance (p/sec/cm<sup>2</sup>/sr). C. Quantification of bioluminescence in  
 68 selected tissues.

A

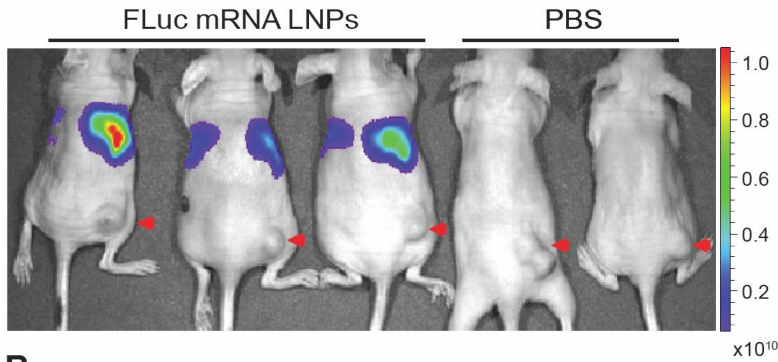

B

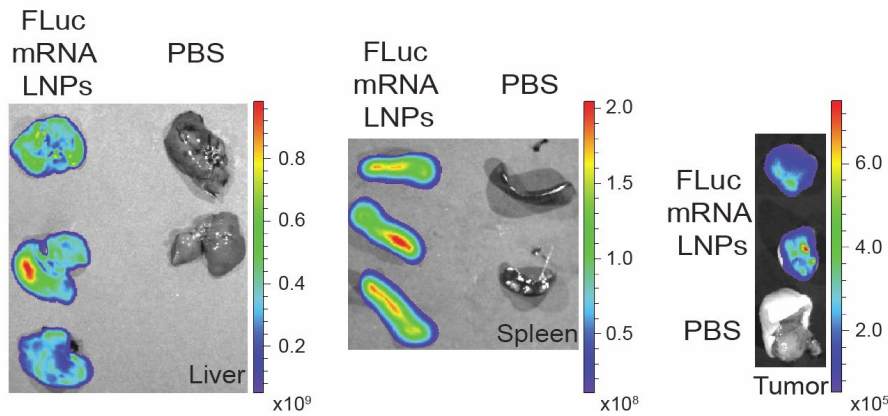

C

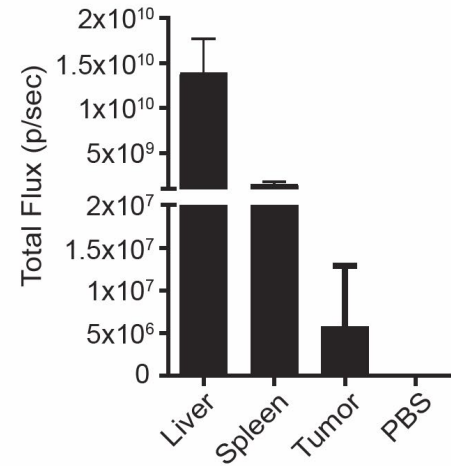

69  
70  
71  
72  
73  
74  
75  
76  
77  
78  
79  
80  
81  
82  
83  
84  
85  
86  
87

88 **Supplemental Figure 5. Effects of treatment with trastuzumab mRNA LNPs on different organs.**  
 89 Haematoxylin and eosin staining of livers and spleens from mice with HER-negative (MDA-MB-  
 90 231) and HER2-positive (MDA-MB-231-HER2) tumors treated with the trastuzumab mRNA or  
 91 PBS (control). Scale bar, 100  $\mu$ m.

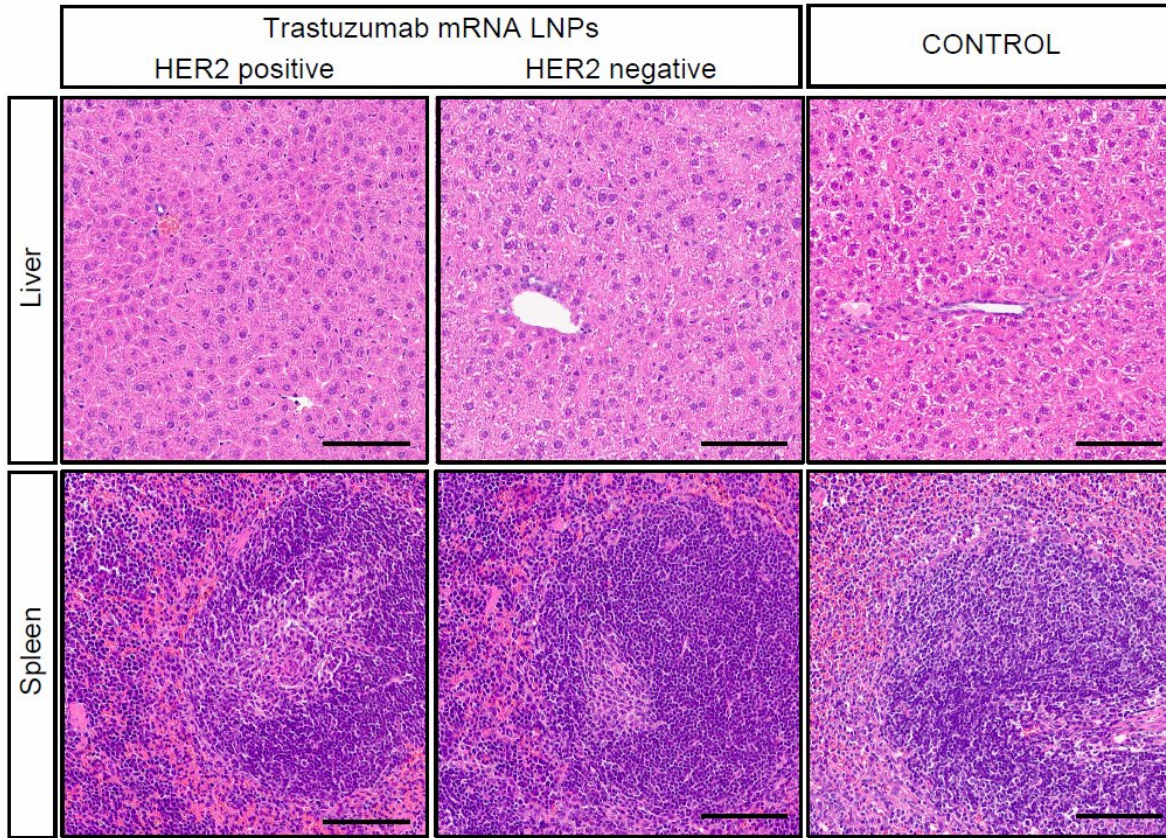

92  
 93 **Supplemental Figure 6. Growth (median $\pm$ IQR) of HER2-negative (MDA-MB-231) and HER2-**  
 94 **positive (MDA-MB-231-HER2) tumors in mice treated with four weekly injections of (A) 2 mg/kg**  
 95 **trastuzumab mRNA (n=5) or saline (n=6); (B) 2 mg/kg trastuzumab mRNA (n=5), 8 mg/kg**  
 96 **Herceptin (n=4) or saline (n=6). Two-way repeated measures ANOVA with Sidak multiple**  
 97 **comparisons tests, \*\* p-value  $\leq$  0.01, \*\*\*\* p-value  $\leq$  0.0001 for HER2-positive tumors treated**  
 98 **with mRNA compared to saline.**

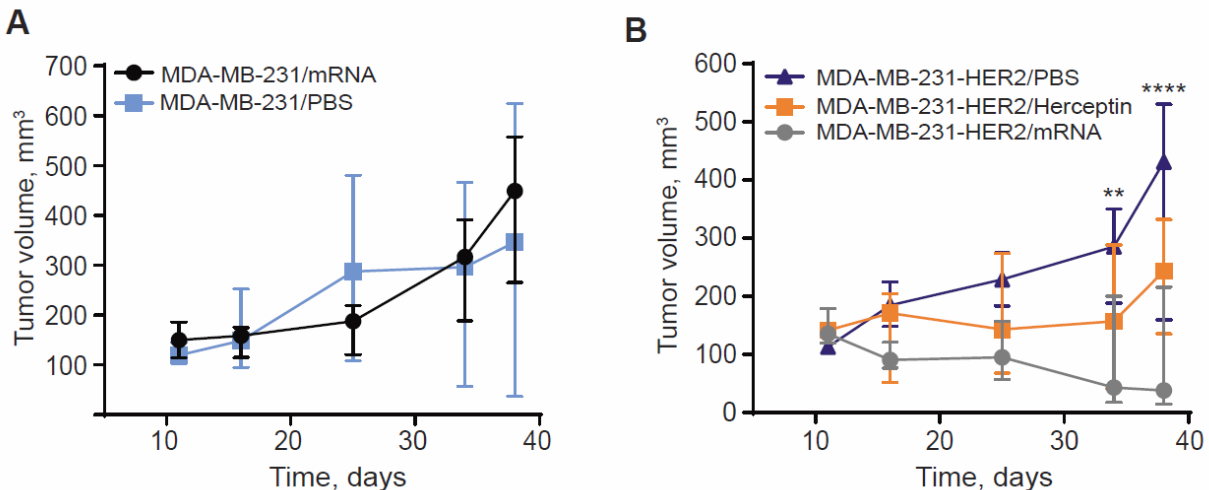

99

100 **Supplemental Table 1. Signal peptide sequences used in the study.**

| Protein name                           | Signal peptide sequence                                      |
|----------------------------------------|--------------------------------------------------------------|
| Gaussian luciferase                    | ATGGGTGTAAAGGTGCTCTTCGCCCTGATATGTATAGCCGTG<br>GCCGAGGCT      |
| Human immunoglobulin light chain kappa | ATGAGGGCTTGGATCTTCTTTCTGCTCTGCCTGGCCGGGCGC<br>GCCTTGGCC      |
| Human immunoglobulin G1 heavy chain    | ATGGACTGGACCTGGAGGTTCTCTTTGTGGTGGCAGCAGCT<br>ACAGGTGTCCAGTCC |

101  
102 **Supplemental Table 3. Effects of treatment with trastuzumab mRNA LNPs on blood cell count**  
103 **parameters in athymic nude mice with MDA-MB-231 or MDA-MB-231-HER2 xenografts.**  
104 *Female athymic nude mice inoculated with MDA-MB-231 or MDA-MB-231-HER2 cells received*  
105 *four weekly i.v. injections of 2 mg/kg trastuzumab mRNA formulated into cKK-E12 nanoparticles*  
106 *or PBS. The serum was collected one week after the final injection. One-way ANOVA followed by*  
107 *Dunnett's post hoc test, \* p-value ≤ 0.05, \*\* p-value ≤ 0.01, \*\*\* p-value ≤ 0.001, \*\*\*\* p-value ≤*  
108 *0.001 compared to healthy mice.*

| Parameter            | Units | Healthy mice | Untreated tumor-bearing mice | MDA-MB-231    | MDA-MB-231-HER2 |
|----------------------|-------|--------------|------------------------------|---------------|-----------------|
|                      |       | Mean±SD, n=3 | Mean±SD, n=3                 | Mean±SD, n=3  | Mean±SD, n=3    |
| <b>Leukocytes:</b>   |       |              |                              |               |                 |
| WBC                  | K/ul  | 10.1 ± 1.6   | 5.1 ± 1.6                    | 12.4 ± 9.4    | 5.6 ± 0.2       |
| NE                   | K/ul  | 2.6 ± 0.7    | 1.7 ± 0.8                    | 7.8 ± 7.5     | 2.7 ± 1         |
| LY                   | K/ul  | 7 ± 0.7      | 3.0 ± 0.6**                  | 3.9 ± 1.6*    | 2.7 ± 0.8**     |
| MO                   | K/ul  | 0.3 ± 0.1    | 0.2 ± 0.1                    | 0.3 ± 0.2     | 0.2 ± 0.1       |
| EO                   | K/ul  | 0.1 ± 0.1    | 0.2 ± 0.2                    | 0.2 ± 0.2     | 0.1 ± 0.0       |
| BA                   | K/ul  | 0 ± 0.1      | 0.1 ± 0.1                    | 0 ± 0         | 0.1 ± 0.1       |
| <b>Erythrocytes:</b> |       |              |                              |               |                 |
| RBC                  | M/ul  | 8.1 ± 0.3    | 6.8 ± 0.1***                 | 8.5 ± 0.2     | 8 ± 0.2         |
| Hb                   | g/dL  | 14.4 ± 0.8   | 11.3 ± 0.1****               | 13.3 ± 0.1*   | 12.8 ± 0.3**    |
| HCT                  | %     | 47.4 ± 8.8   | 36.9 ± 5.6                   | 46 ± 6        | 38.7 ± 0.5      |
| MCV                  | fL    | 58.1 ± 8.2   | 54.1 ± 7.8                   | 54.3 ± 6.1    | 48.2 ± 1.7      |
| MCH                  | pg    | 17.7 ± 0.9   | 16.6 ± 0.1                   | 15.7 ± 0.4**  | 16 ± 0.6*       |
| MCHC                 | g/dL  | 30.9 ± 4.9   | 31 ± 4.1                     | 29.3 ± 3.4    | 33.2 ± 0.6      |
| RDW                  | %     | 15.6 ± 0.2   | 17.5 ± 0.7**                 | 18.3 ± 0.1*** | 18.3 ± 0.5***   |
| <b>Thrombocytes:</b> |       |              |                              |               |                 |
| PLT                  | K/ul  | 688 ± 124    | 347 ± 270.5                  | 866 ± 128     | 936 ± 203.5     |
| MPV                  | fL    | 4.7 ± 0.1    | 5.5 ± 0.8                    | 5.3 ± 0.3     | 5.3 ± 0.1       |

110  
111  
112  
113  
114

115 **Supplemental Table 4. Effects of treatment with trastuzumab mRNA LNPs on parameters of**  
 116 **serum chemistry in athymic nude mice. Female athymic nude mice with MDA-MB-231 or MDA-**  
 117 **MB-231-HER2 xenografts received four weekly i.v. injections of 2 mg/kg trastuzumab mRNA**  
 118 **formulated into cKK-E12 nanoparticles or PBS. The serum was collected one week after the final**  
 119 **injection. One-way ANOVA followed by Dunnett's post hoc test, \* p-value  $\leq 0.05$  compared to**  
 120 **healthy mice.**

| Parameter               | Units | Untreated tumor-bearing mice | MDA-MB-231         | MDA-MB-231-HER2    |
|-------------------------|-------|------------------------------|--------------------|--------------------|
|                         |       | Mean $\pm$ SD, n=4           | Mean $\pm$ SD, n=3 | Mean $\pm$ SD, n=3 |
| Alk Phos                | IU/L  | 27 $\pm$ 16.7                | 51 $\pm$ 15.6      | 45 $\pm$ 3.5       |
| ALT                     | IU/L  | 102.3 $\pm$ 68.1             | 128 $\pm$ 46.1     | 71.7 $\pm$ 7.6     |
| AST                     | IU/L  | 25 $\pm$ 4.7                 | 28 $\pm$ 5.6       | 21.7 $\pm$ 4       |
| CK                      | IU/L  | 499 $\pm$ 637                | 197.5 $\pm$ 2.1    | 118 $\pm$ 17.2     |
| GGT                     | IU/L  | 0 $\pm$ 0                    | 0 $\pm$ 0          | 0 $\pm$ 0          |
| Albumin                 | g/dL  | 2.5 $\pm$ 0.1                | 2.4 $\pm$ 0.3      | 2.4 $\pm$ 0.2      |
| Total Bilirubin         | mg/dL | 0.1 $\pm$ 0.1                | 0.2 $\pm$ 0.1      | 0 $\pm$ 0          |
| Total Protein           | g/dL  | 4.6 $\pm$ 0.3                | 4.2 $\pm$ 0.4      | 4.6 $\pm$ 0.3      |
| Globulin                | g/dL  | 2.1 $\pm$ 0.2                | 1.8 $\pm$ 0.2      | 2.2 $\pm$ 0.4      |
| Bilirubin- Conjugated   | mg/dL | 0 $\pm$ 0                    | 0 $\pm$ 0          | 0 $\pm$ 0          |
| BUN                     | mg/dL | 23.8 $\pm$ 4.4               | 24.7 $\pm$ 4.7     | 18.7 $\pm$ 3.8     |
| Creatinine              | mg/dL | 0.2 $\pm$ 0.1                | 0.1 $\pm$ 0.1      | 0.1 $\pm$ 0        |
| Cholesterol             | mg/dL | 81.3 $\pm$ 16.4              | 102 $\pm$ 4.4      | 87.7 $\pm$ 12.9    |
| Glucose                 | mg/dL | 219.5 $\pm$ 44.9             | 246 $\pm$ 66       | 251 $\pm$ 16.2     |
| Calcium                 | mg/dL | 7 $\pm$ 4.3                  | 8.9 $\pm$ 0.9      | 8.9 $\pm$ 0.7      |
| Phosphorus              | mg/dL | 7.8 $\pm$ 1.8                | 9 $\pm$ 1.9        | 5.9 $\pm$ 0.4      |
| Bicarbonate             | mEq/L | 11 $\pm$ 0.8                 | 13 $\pm$ 1.7       | 14.3 $\pm$ 1.2*    |
| Chloride                | mEq/L | 110.3 $\pm$ 3.1              | 112 $\pm$ 9.1      | 111.3 $\pm$ 5.8    |
| Potassium               | mEq/L | 5.9 $\pm$ 3.5                | 5.4 $\pm$ 0.9      | 4.3 $\pm$ 0.5      |
| ALB/GLOB ratio          | ratio | 1.2 $\pm$ 0.1                | 1.4 $\pm$ 0.1      | 1.1 $\pm$ 0.3      |
| Sodium                  | mEq/L | 148 $\pm$ 2.6                | 148 $\pm$ 13.1     | 147 $\pm$ 8.6      |
| BUN/Creatinine ratio    | ratio | 107.5 $\pm$ 79.8             | 177 $\pm$ 157      | 187 $\pm$ 37.9     |
| Bilirubin- Unconjugated | mEq/L | 0.1 $\pm$ 0.1                | 0.2 $\pm$ 0.1      | 0.1 $\pm$ 0        |
| NA/K                    | ratio | 30.3 $\pm$ 12                | 28 $\pm$ 6.6       | 34.3 $\pm$ 6       |
| Anion Gap               | mEq/L | 32.8 $\pm$ 3.6               | 28.7 $\pm$ 3.5     | 25.3 $\pm$ 2.1*    |

121  
 122  
 123  
 124  
 125  
 126  
 127

128 **Supplemental Table 5.** Physicochemical properties of RNA nanoparticles. Particle size and the  
 129 Polydispersity index were analyzed by dynamic light scattering using Zetasizer Nano (Malvern).  
 130 Encapsulation efficacy was determined with the Quant-iT Ribo-Green assay (Invitrogen). HC –  
 131 heavy chain, LC – light chain. Data are presented as Mean  $\pm$ SD, n=3.

| Trastuzumab HC mRNA to LC mRNA ratio | Polydispersity  | Size                |                            |
|--------------------------------------|-----------------|---------------------|----------------------------|
|                                      |                 | Intensity mean (nm) | Encapsulation efficacy (%) |
| <b>1:1</b>                           | 0.14 $\pm$ 0.02 | 103 $\pm$ 3         | 71 $\pm$ 6                 |
| <b>1:2</b>                           | 0.13 $\pm$ 0.01 | 104 $\pm$ 5         | 76 $\pm$ 3                 |
| <b>1:4</b>                           | 0.15 $\pm$ 0.02 | 101 $\pm$ 3         | 72 $\pm$ 4                 |

132  
 133 **Supplemental Methods**

134 *Generation of MDA-MB-231-HER2 cell line.* MDA-MB-231 cells were retrovirally transduced  
 135 with human HER2 (MSCV-human Erbb2-IRES-GFP, Addgene #91888). Green fluorescent  
 136 protein (GFP) positive cells were sorted by FACS, HER2 expression in the selected cells was  
 137 confirmed by RT-qPCR using HER2-FWD GAAGCCTCACAGAGATCTTG and HER2-REV  
 138 CCTTACACATCGGAGAACAG primers (from (57)).

139 *Cell-based assays.* For transfection with mRNA 500-700 000 cells were seeded per well in 6-well  
 140 plates. Within 24h the cells were transfected with mRNA using Lipofectamine™  
 141 MessengerMAX™ Reagent (Thermo Fisher Scientific) according to the manufacturer's protocol.  
 142 Breast cancer cell survival was analyzed using CellTiter-Glo® Luminescent Cell Viability Assay  
 143 according to the manufacturer's protocol. Briefly, 15 000 cells were plated per well in 96 well  
 144 plate. Next day cells were treated with trastuzumab isolated from mouse blood or with Herceptin  
 145 (Genentech). Two days after the treatment CellTiter was added to the cells and luminescence was  
 146 measured by microplate reader Tecan Infinite® 200 PRO.

147 *IVT-mRNA synthesis.* IVT-mRNA synthesis was performed as previously described (Kauffman et  
 148 al, 2015, 2016). Briefly, DNA plasmids containing a T7 promoter upstream of the sequences of  
 149 trastuzumab heavy or light chain were linearized and transcribed using the HiScribe T7 RNA  
 150 Synthesis Kit (New England Biolabs (NEB)). mRNA was capped with the Vaccinia Capping  
 151 System (NEB), and polyA tails were added to the RNA using a Poly(A) Polymerase Kit (NEB).  
 152 All mRNAs were purified after the transcription and tailing steps using MEGAClear RNA  
 153 purification kit according to manufacturer protocol (Life Technologies). Final purified mRNAs  
 154 contained a 5' cap (Cap1), a 5' UTR consisting of a partial sequence of the cytomegalovirus  
 155 (CMV) immediate early 1 (IE1) gene, a coding region as described below, a 3' UTR consisting of  
 156 a partial sequence of the human growth hormone (hGH) gene, and a 3' polyA tail estimated to be  
 157 approximately 120 nucleotides long.

158 *IVT-mRNA formulation into LNPs.* LNPs were prepared by mixing ethanol and aqueous phase at  
 159 a 1:3 volumetric ratio in a microfluidic device, using syringe pumps as previously described (Chen,  
 160 Love et al., 2012). The ethanol phase was prepared by solubilizing a mixture of ionizable lipidoid  
 161 cKK-E12, 1,2-dioleoyl-sn-glycero-3-phosphoethanolamine (DOPE, Avanti), cholesterol (Avanti),  
 162 and 1,2-dimyristoyl-sn-glycero-3-phosphoethanolamine-N-[methoxy-(polyethyleneglycol)-2000]  
 163 (ammonium salt) (C14-PEG 2000, Avanti) at a molar ratio of 35:16:46.5:2.5 The aqueous phase



164 was prepared in 10 mM citrate buffer (pH 3) with either trastuzumab mRNA or luciferase mRNA  
165 (Firefly luciferase mRNA, TranslateBio). LNPs were dialyzed against PBS in a Slide-A-Lyzer™  
166 G2 Dialysis Cassettes, 20,000 MWCO (Thermo Fisher) for 2h at RT. The concentration of mRNA  
167 encapsulated into LNPs nanoparticles was analyzed using Quant-iT RiboGreen assay (Thermo  
168 Fisher), according to manufacturer's protocol. The efficacy of mRNA encapsulation into LNPs  
169 was calculated by comparing measurements in the absence and presence of 1% (v/v) Triton X-  
170 100. Nanoparticle size, polydispersity (PDI), and ζ-potential were analyzed by dynamic light  
171 scattering (DLS) using Zetasizer Nano ZS (Malvern Instruments, Worcestershire, UK). LNP  
172 hydrodynamic diameters are reported in the volume weighting mode and are an average of three  
173 independent measurements (Supplemental Table 5).

174 *Biodistribution analysis.* cKK-E12 LNPs containing Firefly Luciferase mRNA (TranslateBio)  
175 were injected intravenously into female athymic nude mice via tail vein (2 mg kg<sup>-1</sup>). 6 h after the  
176 injection of the nanoparticles, mice were injected intraperitoneally with 130 μL of D-luciferin (30  
177 mg mL<sup>-1</sup> in PBS, Perkin Elmer). After 10 min, mice were sacrificed by CO<sub>2</sub> asphyxiation and  
178 both tumors and organs (liver and spleen) were isolated and imaged with an IVIS Spectrum In  
179 Vivo Imaging System (PerkinElmer). Florescence signals were quantified using Living Image  
180 software v4.4 (PerkinElmer).

181 *Histological analysis.* Freshly collected tissues were fixed in 4% paraformaldehyde and embedded  
182 into paraffin. Four-micrometer-thick sections were subjected to hematoxylin and eosin staining.

183 *ELISA.* Trastuzumab levels were measured using Invitrogen™ IgG1 Human ELISA Kit (cat.  
184 #EHIGG1) (Figure 1) or AffinityImmuno Trastuzumab (Herceptin®) Pharmacokinetic ELISA  
185 (cat. #EL-1611-201) (Figure 2) according to manufacturers' instructions.

186 *Mass Spectrometry* studies were performed by Swanson Biotechnology Center at David. H Koch  
187 Institute for Integrative Cancer Research at MIT. *IgG enrichment:* Herceptin was isolated from the  
188 samples using the Pierce MS-compatible IP kit protein A/G per manufacturer's instructions. 25  
189 uL of beads were used for 1 ug of Herceptin (determined via ELISA). Beads were washed with  
190 lysis buffer, added to the Herceptin containing samples, and incubated at r.t. for 1 h on a rotator.  
191 The beads were then washed three times with wash buffer A, three times with wash buffer B, and  
192 three times with 100 mM ammonium bicarbonate, pH 8. *Reduction, Alkylation, and Tryptic*  
193 *Digestion:* On-bead reduction, alkylation, and digestion was performed. Proteins were reduced  
194 with 10 mM dithiothreitol (Sigma) for 1h at 56°C and then alkylated with 55 mM iodoacetamide  
195 (Sigma) for 1h at 25°C in the dark. Samples were incubated with PNGaseF for 2 h at 37°C.  
196 Proteins were then digested with modified trypsin (Promega) at an enzyme/substrate ratio of 1:50  
197 in 100 mM ammonium bicarbonate, pH 8 at 25°C overnight. Trypsin activity was halted by  
198 addition of formic acid (99.9%, Sigma) to a final concentration of 5%. Peptides were desalted  
199 using C18 SpinTips (Protea, Morgantown, WV) then vacuum centrifuged and stored at -80 °C.  
200 *LC-MS/MS:* Peptides were loaded on a precolumn and separated by reverse phase HPLC using an  
201 EASY- nLC1000 (Thermo) over a 75 minute gradient before nanoelectrospray using a QExactive  
202 HF-X mass spectrometer (Thermo). The mass spectrometer was operated in a data-dependent  
203 mode. The parameters for the full scan MS were: resolution of 70,000 across 350-2000 m/z, AGC  
204 3e6, and maximum IT 50 ms. The full MS scan was followed by MS/MS for the top 15 precursor  
205 ions in each cycle with a NCE of 28 and dynamic exclusion of 30 s. Raw mass spectral data files  
206 (.raw) were searched using Proteome Discoverer 2.2 (Thermo) and Mascot version 2.4.1 (Matrix  
207 Science). Mascot search parameters were: 10 ppm mass tolerance for precursor ions; 15 mmu for  
208 fragment ion mass tolerance; 2 missed cleavages of trypsin; fixed modification was  
209 carbamidomethylation of cysteine; variable modifications were methionine oxidation, asparagine

210 deamidation. Only peptides with a Mascot score greater than or equal to 25 and an isolation  
211 interference less than or equal to 30 were included in the data analysis.

212 *Gene expression analysis.* RNA was isolated using Omega Bio-tek The E.Z.N.A.® Total RNA Kit  
213 I isolation kit according to manufacturers' instructions. Reverse transcription reaction was  
214 performed using Applied Biosystems™ High-Capacity RNA-to-cDNA™ Kit and 1 ug of RNA.  
215 Levels of mRNAs were assessed by qPCR using Roche LightCycler 480.  $\beta$ -actin mRNA was used  
216 as housekeeping controls. The mRNA levels were normalized to the level of  $\beta$ -actin gene and to  
217 an average value of control group.

218 *The analysis of pharmacokinetic properties of trastuzumab.* Pharmacokinetic parameters of  
219 Trastuzumab were calculated using PKSolver 2.0 software (58). Non-compartmental analysis was  
220 performed on ELISA datasets (Affinity Immuno, Pharmacokinetic Trastuzumab ELISA)  
221 measuring trastuzumab concentration in mouse serum samples collected over the course of 30  
222 days.

223

224
